# Supplementary material for: The clinical value and potential molecular mechanism of the downregulation of MAOA in hepatocellular carcinoma tissues
Source: PubMed Central journal article supplement (PMC7643659; doi:10.1002/cam4.3434), 2020-09-15
Supplement: CAM4-9-8004-s001.pdf [file CAM4-9-8004-s001.pdf]

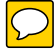

### Supplementary Tables

**Supplementary Table 1.** Basic information of the included external datasets. HCC, hepatocellular carcinoma; N, number; M, mean; SD, standard deviation; TP, true positive; FP, false positive; FN, false negative; TN, true negative.

| Accession | Author                            | Year | Platform | Country     | HCC |       |      | Non-cancer |       |      | TP  | FP | FN  | TN  |
|-----------|-----------------------------------|------|----------|-------------|-----|-------|------|------------|-------|------|-----|----|-----|-----|
|           |                                   |      |          |             | N1  | M1    | SD1  | N2         | M2    | SD2  |     |    |     |     |
| TCGA-GTEX | /                                 | /    | /        | /           | 371 | 12.50 | 1.19 | 225        | 12.71 | 0.64 | 105 | 25 | 266 | 200 |
| GSE112790 | Kaoru Mogushi, et al.             | 2019 | GPL570   | Japan       | 183 | 9.13  | 0.90 | 15         | 9.87  | 0.25 | 120 | 0  | 63  | 15  |
| GSE117361 | Yong Jiang, et al.                | 2019 | GPL6480  | China       | 2   | 9.11  | 1.82 | 2          | 8.78  | 0.94 | 1   | 0  | 1   | 2   |
| GSE98617  | Sara Torrecilla, et al.           | 2019 | GPL14951 | Spain       | 36  | 14.06 | 0.63 | 13         | 12.96 | 1.50 | 17  | 0  | 19  | 13  |
| GSE124535 | Ying Jiang, et al.                | 2019 | GPL20795 | China       | 35  | 5.32  | 0.81 | 35         | 5.51  | 0.40 | 20  | 9  | 15  | 26  |
| GSE128274 | Ge Shan, et al.                   | 2019 | GPL18573 | China       | 4   | 4.74  | 0.61 | 4          | 4.74  | 0.19 | 2   | 0  | 2   | 4   |
| GSE101685 | Yun-Shien Lee, et al.             | 2019 | GPL570   | China       | 24  | 8.17  | 0.92 | 8          | 9.24  | 0.45 | 23  | 1  | 2   | 6   |
| GSE102079 | Kaoru Mogushi, et al.             | 2018 | GPL570   | Japan       | 152 | 9.02  | 0.94 | 105        | 9.46  | 0.48 | 77  | 18 | 75  | 87  |
| GSE107170 | Giacomo Diaz, et al.              | 2018 | GPL570   | Italy       | 124 | 9.51  | 0.86 | 183        | 9.61  | 0.48 | 26  | 8  | 98  | 175 |
| GSE121248 | Kam Hui, et al.                   | 2018 | GPL570   | Singapore   | 70  | 9.46  | 0.90 | 37         | 9.80  | 0.34 | 40  | 9  | 30  | 28  |
| GSE115018 | Guang-Qiang Ye, et al.            | 2018 | GPL20115 | China       | 12  | 1.72  | 1.23 | 12         | 1.93  | 0.56 | 7   | 4  | 5   | 8   |
| GSE112221 | Keith D Robertson, et al.         | 2018 | GPL16791 | USA         | 4   | 4.41  | 0.67 | 6          | 3.62  | 0.60 | 3   | 1  | 1   | 5   |
| GSE87592  | Shi-Long Zhong, et al.            | 2018 | GPL11154 | China       | 27  | 5.45  | 0.34 | 26         | 5.53  | 0.35 | 7   | 2  | 20  | 24  |
| GSE94660  | Seungyeul Yoo, et al.             | 2018 | GPL16791 | USA         | 21  | 4.20  | 0.88 | 21         | 4.20  | 0.27 | 8   | 2  | 13  | 19  |
| GSE45050  | Moses Morakortoi Darpolor, et al. | 2017 | GPL6244  | USA         | 6   | 11.00 | 0.54 | 10         | 10.51 | 0.35 | 5   | 2  | 1   | 8   |
| GSE76297  | Xin-Wei Wang, et al.              | 2017 | GPL17586 | USA         | 61  | 7.96  | 0.71 | 58         | 8.19  | 0.30 | 31  | 9  | 30  | 49  |
| GSE84005  | Jin Song, et al.                  | 2017 | GPL5175  | China       | 38  | 10.26 | 0.96 | 38         | 10.38 | 0.33 | 24  | 18 | 14  | 20  |
| GSE84402  | Zhuo-An Cheng, et al.             | 2017 | GPL570   | China       | 14  | 8.10  | 1.09 | 14         | 8.19  | 0.74 | 7   | 4  | 7   | 10  |
| GSE76427  | Surya Pavan Yenamandra, et al.    | 2017 | GPL10558 | Singapore   | 115 | 12.11 | 0.79 | 52         | 12.08 | 0.57 | 22  | 2  | 93  | 50  |
| GSE87630  | Hyun Goo Woo, et al.              | 2017 | GPL6947  | South Korea | 64  | 11.89 | 0.68 | 30         | 11.93 | 0.21 | 25  | 4  | 39  | 26  |
| GSE89377  | Jungwoo Eun, et al.               | 2017 | GPL6947  | South Korea | 40  | 11.50 | 0.87 | 67         | 11.69 | 0.43 | 23  | 27 | 17  | 40  |
| GSE63018  | Bic Mskcc, et al.                 | 2017 | GPL16791 | USA         | 9   | 11.55 | 0.67 | 9          | 12.98 | 0.61 | 9   | 3  | 0   | 6   |
| GSE73708  | Jian Chen, et al.                 | 2017 | GPL11154 | USA         | 8   | 3.49  | 0.94 | 4          | 3.08  | 0.66 | 7   | 1  | 1   | 3   |
| GSE77509  | Jin Gu, et al.                    | 2017 | GPL16791 | China       | 20  | 13.20 | 0.79 | 20         | 13.97 | 0.42 | 13  | 2  | 7   | 18  |

| Accession                | Author                        | Year | Platform | Country     | HCC |       |      | Non-cancer |       |      | TP | FP | FN  | TN  |
|--------------------------|-------------------------------|------|----------|-------------|-----|-------|------|------------|-------|------|----|----|-----|-----|
|                          |                               |      |          |             | N1  | M1    | SD1  | N2         | M2    | SD2  |    |    |     |     |
| <b>GSE97214</b>          | Yi Huang, et al.              | 2017 | GPL11154 | China       | 9   | 4.80  | 1.14 | 9          | 5.17  | 0.48 | 4  | 0  | 5   | 9   |
| <b>GSE104310</b>         | Jing-Ping Yun, et al.         | 2017 | GPL16791 | China       | 12  | 4.46  | 0.94 | 8          | 4.99  | 0.50 | 5  | 0  | 7   | 8   |
| <b>GSE76311-GPL17586</b> | Xin-Wei Wang, et al.          | 2017 | GPL17586 | USA         | 62  | 7.98  | 0.71 | 59         | 8.19  | 0.30 | 31 | 31 | 9   | 50  |
| <b>GSE56545</b>          | Dong Shen, et al.             | 2016 | GPL15433 | USA         | 21  | 10.37 | 1.13 | 21         | 11.05 | 0.66 | 16 | 6  | 5   | 15  |
| <b>GSE77314</b>          | Gang Liu, et al.              | 2016 | GPL9052  | China       | 50  | 4.48  | 1.12 | 50         | 5.34  | 0.66 | 35 | 10 | 15  | 40  |
| <b>GSE60502</b>          | K.J. Kao, et al.              | 2015 | GPL96    | China       | 18  | 9.61  | 0.86 | 18         | 9.91  | 0.20 | 9  | 0  | 9   | 18  |
| <b>GSE63898</b>          | Augusto Villanueva, et al.    | 2015 | GPL13667 | USA         | 228 | 8.37  | 0.61 | 168        | 8.34  | 0.36 | 61 | 12 | 167 | 156 |
| <b>GSE64041</b>          | Zuzanna Makowska, et al.      | 2015 | GPL6244  | Switzerland | 60  | 9.63  | 0.71 | 65         | 9.82  | 0.43 | 45 | 38 | 15  | 27  |
| <b>GSE57555</b>          | Y-H. Taguchi, et al.          | 2015 | GPL16699 | Japan       | 5   | 0.68  | 0.76 | 5          | 0.44  | 0.24 | 3  | 1  | 2   | 4   |
| <b>GSE67764</b>          | Bin Wu, et al.                | 2015 | GPL17077 | China       | 3   | 2.04  | 0.97 | 6          | 3.04  | 0.25 | 2  | 0  | 1   | 6   |
| <b>GSE74656</b>          | Hui-Yong Yin, et al.          | 2015 | GPL16043 | China       | 5   | 7.60  | 1.32 | 5          | 8.85  | 0.10 | 4  | 0  | 1   | 5   |
| <b>GSE57727</b>          | Manel Esteller, et al.        | 2015 | GPL14951 | Spain       | 57  | 11.28 | 1.01 | 5          | 11.41 | 0.49 | 39 | 2  | 18  | 3   |
| <b>GSE59259</b>          | Alberto Ferrarini, et al.     | 2015 | GPL18451 | Italy       | 8   | 12.33 | 0.80 | 8          | 13.09 | 0.30 | 6  | 1  | 2   | 7   |
| <b>GSE65485</b>          | Hua Dong, et al.              | 2015 | GPL11154 | China       | 50  | 4.69  | 1.23 | 5          | 5.09  | 0.26 | 26 | 0  | 24  | 5   |
| <b>GSE63863</b>          | Hong Zhang, et al.            | 2015 | GPL11154 | China       | 12  | 4.10  | 1.01 | 12         | 5.05  | 0.36 | 11 | 1  | 1   | 11  |
| <b>GSE69164</b>          | Hong Zhang, et al.            | 2015 | GPL11154 | China       | 11  | 3.90  | 0.76 | 11         | 5.02  | 0.36 | 11 | 1  | 0   | 10  |
| <b>GSE22405</b>          | Henry H Zhang, et al.         | 2014 | GPL10553 | USA         | 24  | 7.72  | 1.17 | 24         | 7.63  | 0.74 | 5  | 1  | 19  | 23  |
| <b>GSE45436</b>          | Jui-Yu Hsieh, et al.          | 2014 | GPL570   | China       | 93  | 8.04  | 0.98 | 41         | 8.62  | 0.34 | 44 | 0  | 49  | 41  |
| <b>GSE55092</b>          | Patrizia Farci, et al.        | 2014 | GPL570   | USA         | 49  | 9.46  | 1.00 | 91         | 9.78  | 0.43 | 13 | 0  | 36  | 91  |
| <b>GSE62232</b>          | Sandrine Imbeaud, et al.      | 2014 | GPL570   | France      | 81  | 8.77  | 0.96 | 10         | 9.36  | 0.21 | 45 | 0  | 36  | 10  |
| <b>GSE54236</b>          | Erica Villa, et al.           | 2014 | GPL6480  | Italy       | 81  | 11.57 | 0.91 | 80         | 12.05 | 0.44 | 31 | 6  | 50  | 74  |
| <b>GSE54238</b>          | Jie Wang, et al.              | 2014 | GPL16955 | USA         | 26  | 11.02 | 1.28 | 30         | 10.99 | 1.64 | 13 | 8  | 13  | 22  |
| <b>GSE39791</b>          | Sangbae Kim, et al.           | 2014 | GPL10558 | USA         | 72  | 10.26 | 1.16 | 72         | 10.56 | 0.63 | 21 | 7  | 51  | 65  |
| <b>GSE47595</b>          | Yujin Hoshida, et al.         | 2014 | GPL13369 | USA         | 88  | 11.15 | 2.54 | 48         | 10.97 | 2.86 | 43 | 19 | 45  | 29  |
| <b>GSE57957</b>          | Lee Guat Lay Caroline, et al. | 2014 | GPL10558 | Singapore   | 39  | 12.07 | 0.70 | 39         | 12.32 | 0.40 | 28 | 12 | 11  | 27  |
| <b>GSE55048</b>          | Tao Cai, et al.               | 2014 | GPL9115  | China       | 4   | 5.12  | 0.84 | 4          | 4.77  | 0.42 | 4  | 3  | 0   | 1   |
| <b>GSE46444</b>          | Yujin Hoshida, et al.         | 2014 | GPL15314 | USA         | 88  | 11.15 | 2.54 | 48         | 10.97 | 2.86 | 71 | 35 | 17  | 13  |

| Accession                | Author                    | Year | Platform | Country     | HCC |       |      | Non-cancer |       |      | TP  | FP | FN  | TN  |
|--------------------------|---------------------------|------|----------|-------------|-----|-------|------|------------|-------|------|-----|----|-----|-----|
|                          |                           |      |          |             | N1  | M1    | SD1  | N2         | M2    | SD2  |     |    |     |     |
| <b>GSE56140</b>          | Yujin Hoshida, et al.     | 2014 | GPL13825 | USA         | 35  | 11.30 | 0.71 | 34         | 11.40 | 0.25 | 13  | 2  | 22  | 32  |
| <b>GSE17548</b>          | Mehmet Ozturk, et al.     | 2013 | GPL570   | Turkey      | 17  | 9.07  | 1.07 | 20         | 9.45  | 0.56 | 8   | 3  | 9   | 17  |
| <b>GSE41804</b>          | Yuji Hodo, et al.         | 2013 | GPL570   | Japan       | 20  | 11.34 | 0.98 | 20         | 11.59 | 0.41 | 13  | 7  | 7   | 13  |
| <b>GSE46408</b>          | Yung-Ming Jeng, et al.    | 2013 | GPL4133  | China       | 6   | 12.06 | 1.14 | 6          | 13.02 | 0.48 | 5   | 0  | 1   | 6   |
| <b>GSE50579</b>          | Robert Geffers, et al.    | 2013 | GPL14550 | Germany     | 67  | 12.79 | 1.02 | 10         | 12.76 | 0.51 | 29  | 1  | 38  | 9   |
| <b>GSE25599</b>          | Biao-Yang Lin, et al.     | 2013 | GPL9052  | China       | 10  | 5.72  | 0.84 | 10         | 5.17  | 0.43 | 7   | 1  | 3   | 9   |
| <b>GSE33294</b>          | Chi-Ho Lin, et al.        | 2013 | GPL16791 | China       | 3   | 1.53  | 5.84 | 3          | 0.93  | 7.38 | 3   | 2  | 0   | 1   |
| <b>GSE33006</b>          | Yi Huang, et al.          | 2012 | GPL570   | China       | 3   | 11.59 | 0.10 | 3          | 10.13 | 2.21 | 3   | 1  | 0   | 2   |
| <b>GSE31370</b>          | Hyun Goo Woo, et al.      | 2012 | GPL10558 | South Korea | 15  | 4.66  | 0.96 | 5          | 5.13  | 0.18 | 8   | 0  | 7   | 5   |
| <b>GSE36376</b>          | Cheol-Keun Park, et al.   | 2012 | GPL10558 | South Korea | 240 | 10.75 | 0.83 | 193        | 10.81 | 0.38 | 53  | 9  | 187 | 184 |
| <b>GSE36411</b>          | Sang-Yeop Lee, et al.     | 2012 | GPL10558 | South Korea | 42  | 12.37 | 0.92 | 42         | 12.61 | 0.37 | 19  | 8  | 23  | 34  |
| <b>GSE29721</b>          | Moshe Szyf, et al.        | 2011 | GPL570   | Canada      | 10  | 8.08  | 0.78 | 10         | 8.71  | 0.32 | 7   | 1  | 3   | 9   |
| <b>GSE20140-GPL18461</b> | Yujin Hoshida, et al.     | 2011 | GPL18461 | USA         | 35  | 11.30 | 0.71 | 34         | 11.40 | 0.25 | 13  | 2  | 22  | 32  |
| <b>GSE25097</b>          | Chunsheng Zhang, et al    | 2011 | GPL13369 | USA         | 268 | 3.52  | 0.87 | 289        | 3.48  | 0.39 | 110 | 35 | 158 | 254 |
| <b>GSE20140-GPL5474</b>  | Yujin Hoshida, et al.     | 2011 | GPL5474  | USA         | 80  | 12.88 | 0.80 | 307        | 12.00 | 0.61 | 63  | 62 | 17  | 245 |
| <b>GSE12941</b>          | satow reiko, et al.       | 2010 | GPL5175  | Japan       | 10  | 10.35 | 0.59 | 10         | 10.36 | 0.22 | 4   | 0  | 6   | 10  |
| <b>GSE14520-GPL571</b>   | Xin-Wei Wang, et al.      | 2010 | GPL571   | USA         | 22  | 7.04  | 0.85 | 21         | 7.88  | 0.37 | 13  | 1  | 9   | 20  |
| <b>GSE14520-GPL3921</b>  | Xin-Wei Wang, et al.      | 2010 | GPL3921  | USA         | 225 | 7.57  | 0.95 | 220        | 8.17  | 0.52 | 114 | 27 | 111 | 193 |
| <b>GSE19665</b>          | Atsushi Kaneda, et al.    | 2010 | GPL570   | Japan       | 10  | 9.34  | 0.61 | 10         | 9.13  | 0.47 | 6   | 3  | 4   | 7   |
| <b>GSE22058</b>          | Julja Burchard, et al.    | 2010 | GPL10687 | USA         | 100 | 12.69 | 0.56 | 97         | 12.72 | 0.21 | 32  | 2  | 68  | 95  |
| <b>GSE14323</b>          | Kellie J. Archer, et al.  | 2009 | GPL571   | USA         | 55  | 8.24  | 0.44 | 60         | 8.47  | 0.60 | 49  | 40 | 6   | 20  |
| <b>GSE17967</b>          | Kellie J. Archer, et al.  | 2009 | GPL571   | USA         | 16  | 7.93  | 0.35 | 47         | 7.85  | 0.39 | 10  | 21 | 6   | 26  |
| <b>GSE6222</b>           | Ann-Ping Tsou, et al.     | 2008 | GPL570   | China       | 10  | 8.07  | 0.70 | 2          | 9.10  | 0.65 | 8   | 0  | 2   | 2   |
| <b>GSE9839</b>           | Luigi Terracciano, et al. | 2008 | GPL571   | Switzerland | 3   | 9.74  | 0.79 | 3          | 9.64  | 0.42 | 2   | 1  | 1   | 2   |
| <b>GSE6764</b>           | Elisa Wurmbach, et al.    | 2007 | GPL570   | USA         | 35  | 9.02  | 0.75 | 40         | 9.36  | 0.44 | 21  | 7  | 14  | 33  |

**Supplementary Table 2.** Clinical features of HCC patients based on the included datasets. HCC, hepatocellular carcinoma; N, number; M, mean; SD, standard deviation; AFP, Alpha-fetoprotein. To determine the statistical significance of difference between groups, independent-samples t-test or one-way analysis of variance (ANOVA) was used.

| Clinical features         | N   | Expression level of MAOA |        |         |         |
|---------------------------|-----|--------------------------|--------|---------|---------|
|                           |     | M                        | SD     | t or F  | P-value |
| <b>Tissue</b>             |     |                          |        |         |         |
| HCC                       | 344 | 12.4549                  | 1.2029 | 2.2190  | 0.0270* |
| Non-cancer                | 33  | 12.9232                  | 0.4574 |         |         |
| <b>Age (years)</b>        |     |                          |        |         |         |
| <60                       | 174 | 12.6178                  | 1.0875 | 2.4660  | 0.0140* |
| ≥60                       | 169 | 12.3002                  | 1.2869 |         |         |
| <b>Sex</b>                |     |                          |        |         |         |
| Male                      | 217 | 12.5002                  | 1.2130 | 1.1340  | 0.2580  |
| Female                    | 94  | 12.3338                  | 1.1784 |         |         |
| <b>Race</b>               |     |                          |        |         |         |
| Asian                     | 153 | 12.2688                  | 1.3681 | 2.8830  | 0.0040* |
| Non-Asian                 | 151 | 12.6664                  | 1.0123 |         |         |
| <b>Ethnicity</b>          |     |                          |        |         |         |
| Hispanic or Latino        | 18  | 12.7399                  | 1.1187 | 0.9390  | 0.3595  |
| Not Hispanic or Latino    | 340 | 12.4851                  | 1.1810 |         |         |
| <b>Vital status</b>       |     |                          |        |         |         |
| Alive                     | 247 | 12.3685                  | 1.2468 | 2.7430  | 0.0070* |
| Dead                      | 64  | 12.7640                  | 0.9631 |         |         |
| <b>Pathological stage</b> |     |                          |        |         |         |
| Stages I-II               | 240 | 12.4525                  | 1.1501 | -0.8340 | 0.4060  |
| Stages III-IV             | 82  | 12.3135                  | 1.3503 |         |         |
| <b>Tumor</b>              |     |                          |        |         |         |
| T1-2                      | 280 | 12.5206                  | 1.0935 | 0.7615  | 0.4469  |
| T3-4                      | 94  | 12.4146                  | 1.3687 |         |         |
| <b>Pathologic stage</b>   |     |                          |        |         |         |
| Stage I                   | 175 | 12.4424                  | 1.0951 | 0.6345  | 0.5932  |
| Stage II                  | 87  | 12.5692                  | 1.1467 |         |         |
| Stage III                 | 86  | 12.3649                  | 1.3448 |         |         |
| Stage IV                  | 5   | 12.8406                  | 0.3024 |         |         |
| <b>Tumor</b>              |     |                          |        |         |         |
| T1                        | 185 | 12.4696                  | 1.0813 | 1.2426  | 0.2924  |
| T2                        | 95  | 12.6200                  | 1.1160 |         |         |
| T3                        | 81  | 12.3279                  | 1.3935 |         |         |
| T4                        | 13  | 12.9550                  | 1.0982 |         |         |
| TX                        | 1   | 12.8506                  | /      |         |         |
| <b>Node</b>               |     |                          |        |         |         |
| Yes                       | 4   | 12.4224                  | 1.0359 | -0.0321 | 0.9763  |
| No                        | 257 | 12.4392                  | 1.2131 |         |         |
| <b>Metastasis</b>         |     |                          |        |         |         |

|                                                    |     |         |        |         |         |
|----------------------------------------------------|-----|---------|--------|---------|---------|
| Yes                                                | 4   | 12.9285 | 0.2652 | 3.2193  | 0.0229* |
| No                                                 | 270 | 12.4414 | 1.1979 |         |         |
| <b>Neoplasm histologic grade</b>                   |     |         |        |         |         |
| G1                                                 | 55  | 12.6491 | 0.9236 | 3.1157  | 0.0262* |
| G2                                                 | 180 | 12.5732 | 1.1969 |         |         |
| G3                                                 | 124 | 12.3655 | 1.1498 |         |         |
| G4                                                 | 13  | 11.7081 | 1.4961 |         |         |
| <b>Child pugh classification grade</b>             |     |         |        |         |         |
| A                                                  | 223 | 12.4861 | 1.1444 | 0.6112  | 0.5435  |
| B                                                  | 21  | 12.7682 | 0.7933 |         |         |
| C                                                  | 1   | 12.4341 | /      |         |         |
| <b>Adjacent hepatic tissue inflammation status</b> |     |         |        |         |         |
| None                                               | 119 | 12.6330 | 0.9507 | 0.4732  | 0.6236  |
| Mild                                               | 101 | 12.5451 | 1.3342 |         |         |
| Severe                                             | 19  | 12.3826 | 0.8483 |         |         |
| <b>AFP (ng/mL)</b>                                 |     |         |        |         |         |
| ≤ 20                                               | 152 | 12.6351 | 0.9055 | -2.5491 | 0.0113* |
| >20                                                | 132 | 12.2982 | 1.3082 |         |         |
| <b>Viral hepatitis</b>                             |     |         |        |         |         |
| No                                                 | 139 | 12.3702 | 1.3694 | -1.1060 | 0.2700  |
| Yes                                                | 189 | 12.5252 | 1.0791 |         |         |
| <b>Alcohol consumption</b>                         |     |         |        |         |         |
| No                                                 | 217 | 12.4472 | 1.2680 | 0.2680  | 0.7890  |
| Yes                                                | 111 | 12.4834 | 1.0964 |         |         |

---

**Footnote:** \* A P-value < 0.05 indicates statistically significant.

**Supplementary Table 3.** Mutation types of MAOA in hepatocellular carcinoma patients based on the Catalogue of Somatic Mutations in Cancer.

| Position | CDS Mutation | AA Mutation | Legacy Mutation ID | Count | Type                         |
|----------|--------------|-------------|--------------------|-------|------------------------------|
| 10       | c.30G>T      | p.A10=      | COSM6251648        | 1     | Substitution - coding silent |
| 126      | c.377A>G     | p.N126S     | COSM3766948        | 1     | Substitution - Missense      |
| 129      | c.385A>G     | p.R129G     | COSM4926748        | 1     | Substitution - Missense      |
| 155      | c.465G>T     | p.M155I     | COSM6333993        | 1     | Substitution - Missense      |
| 220      | c.660A>T     | p.V220=     | COSM5822820        | 1     | Substitution - coding silent |
| 232      | c.695A>G     | p.D232G     | COSM6275505        | 1     | Substitution - Missense      |
| 300      | c.898A>G     | p.M300V     | COSM4950441        | 1     | Substitution - Missense      |
| 327      | c.980A>C     | p.E327A     | COSM131419         | 1     | Substitution - Missense      |
| 331      | c.991G>T     | p.A331S     | COSM6277430        | 1     | Substitution - Missense      |
| 446      | c.1338A>T    | p.E446D     | COSM4916798        | 1     | Substitution - Missense      |

**Supplementary Table 4.** Disease ontology, gene ontology, and Kyoto Encyclopedia of Genes and Genomes analysis of the intersection of MAOA positively related co-expressed genes and downregulated differentially expressed genes.

| ID                        | Description                    | Gene ratio | Bg ratio  | P-value  | Adjusted P | q-value  | Gene ID                                                                                                                                                                                                                                                         | Count |
|---------------------------|--------------------------------|------------|-----------|----------|------------|----------|-----------------------------------------------------------------------------------------------------------------------------------------------------------------------------------------------------------------------------------------------------------------|-------|
| <b>Disease Ontology</b>   |                                |            |           |          |            |          |                                                                                                                                                                                                                                                                 |       |
| DOID:3393                 | coronary artery disease        | 34/301     | 348/8007  | 2.45E-07 | 0.000206   | 0.000181 | CYP3A4, ARG1, LIPG, F11, CYP4F2, HP, CYP2C9, CYP2C8, LPA, ABCC9, APOA5, MBL2, APOC4, CYP1A2, CYP2C19, ESR1, IGF1, CD14, AGTR1, CNDP1, VKORC1, KCNMA1, CETP, HNF1A, ADAMTS13, VEGFA, ADRA2B, IGFBP3, PSMA6, TIMP3, CXCL12, CRP, NPC1L1, SELE                     | 34    |
| DOID:5844                 | myocardial infarction          | 27/301     | 279/8007  | 5.48E-06 | 0.002303   | 0.002029 | ARG1, LIPG, F11, CYP4F2, HP, CYP2C9, CYP2C8, LPA, ABCC9, APOA5, MBL2, CYP1A2, CYP2C19, ESR1, IGF1, CD14, AGTR1, KCNMA1, CETP, ADAMTS13, VEGFA, ADRA2B, PSMA6, TIMP3, CXCL12, CRP, SELE                                                                          | 27    |
| DOID:655                  | inherited metabolic disorder   | 29/301     | 331/8007  | 1.7E-05  | 0.004765   | 0.004199 | BHMT, NR1I2, ABCG5, CBS, LPA, XDH, ABCC9, APOA5, BCKDHA, GCKR, CYP2E1, CYP1A2, ESR1, IGF1, ASL, LCAT, AGTR1, XBP1, PNPLA3, CETP, VEGFA, ECM1, PLIN1, HBB, CXCL12, HAMP, CRP, NPC1L1, SELE                                                                       | 29    |
| DOID:13580                | cholestasis                    | 10/301     | 62/8007   | 9.19E-05 | 0.015759   | 0.013886 | ABCB11, NR1I3, NR1I2, MME, SLC22A1, ESR1, CD14, SLC22A3, VEGFA, SELE                                                                                                                                                                                            | 10    |
| DOID:18                   | urinary system disease         | 35/301     | 478/8007  | 0.000102 | 0.015759   | 0.013886 | CYP4A11, ACACB, HP, CYP2C9, MME, LPA, XDH, ITIH4, ADRA1A, MBL2, ESR1, IGF1, ALPL, PROZ, ADRA1B, AGTR1, CRHBP, DUSP1, CETP, MT2A, ICAM3, ADAMTS13, CCL15, PTH1R, VEGFA, NGFR, SLC34A1, TRPV1, IGFBP3, HAMP, CRP, FOS, ILK, MT1A, SELE                            | 35    |
| <b>Biological Process</b> |                                |            |           |          |            |          |                                                                                                                                                                                                                                                                 |       |
| GO:0016054                | organic acid catabolic process | 45/515     | 250/17913 | 2.95E-23 | 5.92E-20   | 5.31E-20 | ACADL, MAT1A, AGXT, HPD, ALDH4A1, CYP4F3, ADHFE1, ARG1, AMACR, CBS, AGXT2, CYP4F2, TAT, CYP4A11, CYP4F12, AASS, ACACB, AKR1D1, AMDHD1, CTH, HAO2, ACADS, BCKDHA, CYP39A1, GSTZ1, TDO2, FTCD, ALDH8A1, KMO, SDS, AADAT, MTHFS, ASPA, CSAD, GLDC, HOGA1, CYP26A1, | 45    |

|            |                                       |        |           |          |          |          |                                                                                                                                                                                                                                                                                                                                                                        |    |
|------------|---------------------------------------|--------|-----------|----------|----------|----------|------------------------------------------------------------------------------------------------------------------------------------------------------------------------------------------------------------------------------------------------------------------------------------------------------------------------------------------------------------------------|----|
| GO:0046395 | carboxylic acid catabolic process     | 45/515 | 250/17913 | 2.95E-23 | 5.92E-20 | 5.31E-20 | PLIN5, HAL, UROC1, IDO2, LYVE1, CEL, STAB2, PRODH<br>ACADL, MAT1A, AGXT, HPD, ALDH4A1, CYP4F3, ADHFE1, ARG1, AMACR, CBS, AGXT2, CYP4F2, TAT, CYP4A11, CYP4F12, AASS, ACACB, AKR1D1, AMDHD1, CTH, HAO2, ACADS, BCKDHA, CYP39A1, GSTZ1, TDO2, FTCD, ALDH8A1, KMO, SDS, AADAT, MTHFS, ASPA, CSAD, GLDC, HOGA1, CYP26A1, PLIN5, HAL, UROC1, IDO2, LYVE1, CEL, STAB2, PRODH | 45 |
| GO:1901605 | alpha-amino acid metabolic process    | 38/515 | 200/17913 | 1.17E-20 | 1.56E-17 | 1.4E-17  | BHMT, CPS1, GLYAT, MAT1A, AGXT, HPD, ALDH4A1, GNMT, ADHFE1, ARG1, CBS, AGXT2, TAT, AASS, AMDHD1, CTH, NAGS, GSTZ1, TDO2, FTCD, ALDH8A1, KMO, SDS, AADAT, MTHFS, ASPA, CSAD, GLDC, HOGA1, DCT, HAL, UROC1, IDO2, MTHFD2L, ADSSL1, OAT, ACCS, PRODH                                                                                                                      | 38 |
| GO:0044282 | small molecule catabolic process      | 52/515 | 404/17913 | 7.75E-20 | 7.78E-17 | 6.98E-17 | ACADL, MAT1A, AGXT, HPD, ALDH4A1, CYP4F3, ADHFE1, ARG1, AMACR, CBS, AGXT2, CYP4F2, TAT, CYP4A11, CYP4F12, AASS, ACACB, AKR1D1, AMDHD1, CTH, HAO2, ACADS, BCKDHA, ADH4, CYP1A1, CYP39A1, GSTZ1, TDO2, FTCD, ALDH8A1, KMO, SDS, AADAT, MTHFS, SULT1B1, SULT1E1, ASPA, CSAD, CDA, GLDC, HOGA1, CYP26A1, PLIN5, HAL, UROC1, ENO3, IDO2, LYVE1, CYP46A1, CEL, STAB2, PRODH  | 52 |
| GO:0006520 | cellular amino acid metabolic process | 47/515 | 347/17913 | 6.31E-19 | 5.07E-16 | 4.54E-16 | BHMT, CPS1, GLYAT, MAT1A, AGXT, HPD, ALDH4A1, GNMT, ADHFE1, ARG1, CBS, AGXT2, TAT, AASS, PSMA2, AMDHD1, CTH, BCKDHA, NAGS, GSTZ1, TDO2, FTCD, ALDH8A1, KMO, SDS, AADAT, MTHFS, ACY1, ASPA, CSAD, GLS2, SLC7A2, GLDC, HOGA1, SCLY, DCT, HAL, UROC1, IDO2, PSMC1, ASPG, MTHFD2L, PSMA6, ADSSL1, OAT, ACCS, PRODH                                                         | 47 |

### Cellular Component



|                           |                                   |        |           |          |          |          |                                                                                                                                                                                                                                                                                                                                                             |    |
|---------------------------|-----------------------------------|--------|-----------|----------|----------|----------|-------------------------------------------------------------------------------------------------------------------------------------------------------------------------------------------------------------------------------------------------------------------------------------------------------------------------------------------------------------|----|
| GO:0072562                | blood microparticle               | 18/539 | 147/18678 | 2.51E-07 | 0.00011  | 0.000106 | C8A, AFM, HP, ITIH4, CFB, C1R, CFHR3, A1BG, ORM1, SERPINA3, FCN2, C9, CD5L, ORM2, FCN3, HBB, PZP, HBD                                                                                                                                                                                                                                                       | 18 |
| GO:0034358                | plasma lipoprotein particle       | 7/539  | 37/18678  | 7.78E-05 | 0.008693 | 0.00836  | LPA, APOA5, APOC4, APOF, LCAT, SAA4, CETP                                                                                                                                                                                                                                                                                                                   | 7  |
| GO:1990777                | lipoprotein particle              | 7/539  | 37/18678  | 7.78E-05 | 0.008693 | 0.00836  | LPA, APOA5, APOC4, APOF, LCAT, SAA4, CETP                                                                                                                                                                                                                                                                                                                   | 7  |
| GO:0034364                | high-density lipoprotein particle | 6/539  | 26/18678  | 7.9E-05  | 0.008693 | 0.00836  | APOA5, APOC4, APOF, LCAT, SAA4, CETP                                                                                                                                                                                                                                                                                                                        | 6  |
| GO:0032994                | protein-lipid complex             | 7/539  | 39/18678  | 0.000111 | 0.009727 | 0.009355 | LPA, APOA5, APOC4, APOF, LCAT, SAA4, CETP                                                                                                                                                                                                                                                                                                                   | 7  |
| <b>Molecular Function</b> |                                   |        |           |          |          |          |                                                                                                                                                                                                                                                                                                                                                             |    |
| GO:0004497                | monooxygenase activity            | 23/511 | 86/16969  | 5.11E-16 | 3.25E-13 | 2.79E-13 | CYP3A4, CYP4F3, CYP4F2, CYP4A11, CYP4F12, CYP2C9, CYP2C8, CYP3A43, CYP1A1, CYP39A1, CYP2E1, CYP1A2, CYP2C19, CYP2A6, CYP2B6, KMO, CYP2A7, CYP26A1, CYP4A22, DBH, CYP46A1, CYP11B1, MICAL3                                                                                                                                                                   | 23 |
| GO:0048037                | cofactor binding                  | 49/511 | 438/16969 | 1.86E-15 | 5.91E-13 | 5.08E-13 | ACADL, CYP3A4, AGXT, CYP4F3, CBS, AGXT2, CYP4F2, OGDHL, TAT, CYP4A11, CYP4F12, ACACB, CTH, XDH, ACADS, CYP3A43, ADH4, CYP1A1, CYP39A1, CYP2E1, CYP1A2, CYP2C19, CYP2A6, CYP2B6, NDUFV2, TDO2, GPD1, KMO, SDS, AADAT, GCH1, CSAD, DHODH, VKORC1, GLDC, CYP26A1, HPGD, PNPLA3, IDO2, CYP4A22, DBH, CYP46A1, AOC2, CYP11B1, STEAP4, ACCS, GSTM2, MICAL3, PRODH | 49 |
| GO:0020037                | heme binding                      | 21/511 | 106/16969 | 5.58E-12 | 1.18E-09 | 1.01E-09 | CYP3A4, CYP4F3, CBS, CYP4F2, CYP4A11, CYP4F12, CYP3A43, CYP1A1, CYP39A1, CYP2E1, CYP1A2, CYP2C19, CYP2A6, CYP2B6, TDO2, CYP26A1, IDO2, CYP4A22, CYP46A1, CYP11B1, STEAP4                                                                                                                                                                                    | 21 |
| GO:0046906                | tetrapyrrole binding              | 21/511 | 116/16969 | 3.41E-11 | 5.41E-09 | 4.65E-09 | CYP3A4, CYP4F3, CBS, CYP4F2, CYP4A11, CYP4F12, CYP3A43, CYP1A1, CYP39A1, CYP2E1, CYP1A2,                                                                                                                                                                                                                                                                    | 21 |

|                     |                                              |        |           |          |          |          |                                                                                                                                                                                                                                                                              |    |
|---------------------|----------------------------------------------|--------|-----------|----------|----------|----------|------------------------------------------------------------------------------------------------------------------------------------------------------------------------------------------------------------------------------------------------------------------------------|----|
| GO:0005506          | iron ion binding                             | 23/511 | 144/16969 | 5.66E-11 | 7.19E-09 | 6.17E-09 | CYP2C19, CYP2A6, CYP2B6, TDO2, CYP26A1, IDO2, CYP4A22, CYP46A1, CYP11B1, STEAP4, CYP3A4, CYP8B1, CYP4F3, CYP4F2, CYP4A11, CYP4F12, CYP2C9, CYP2C8, XDH, CYP3A43, CYP1A1, CYP39A1, BBOX1, CYP2E1, CYP1A2, CYP2C19, CYP2A6, CYP2B6, CYP2A7, CYP26A1, CYP4A22, CYP46A1, CYP11B1 | 23 |
| <b>KEGG pathway</b> |                                              |        |           |          |          |          |                                                                                                                                                                                                                                                                              |    |
| hsa00830            | Retinol metabolism                           | 15/325 | 67/8011   | 4.9E-08  | 1.34E-05 | 1.21E-05 | CYP3A4,ADH1A,CYP4A11,RDH16,CYP2C9,CYP2C8,ADH4,CYP1A1,CYP1A2,CYP2A6,CYP2B6,RDH5,CYP26A1,CYP4A22,UGT2B17                                                                                                                                                                       | 15 |
| hsa05204            | Chemical carcinogenesis                      | 16/325 | 82/8011   | 1.36E-07 | 1.87E-05 | 1.68E-05 | CYP3A4,ADH1A,CYP2C9,CYP2C8,CYP3A43,ADH4,CYP1A1,NAT2,CYP2E1,CYP1A2,CYP2C19,CYP2A6,GSTA5,UGT2B17,GSTT2,GSTM2                                                                                                                                                                   | 16 |
| hsa00982            | Drug metabolism - cytochrome P450            | 14/325 | 72/8011   | 8.76E-07 | 8E-05    | 7.19E-05 | CYP3A4,ADH1A,CYP2C9,CYP2C8,ADH4,CYP2E1,CYP1A2,CYP2C19,CYP2A6,CYP2B6,GSTA5,UGT2B17,GSTT2,GSTM2                                                                                                                                                                                | 14 |
| hsa00980            | Metabolism of xenobiotics by cytochrome P450 | 13/325 | 76/8011   | 9.61E-06 | 0.000658 | 0.000592 | CYP3A4,ADH1A,CYP2C9,ADH4,CYP1A1,CYP2E1,CYP1A2,CYP2A6,CYP2B6,GSTA5,UGT2B17,GSTT2,GSTM2                                                                                                                                                                                        | 13 |
| hsa00140            | Steroid hormone biosynthesis                 | 11/325 | 60/8011   | 2.38E-05 | 0.001093 | 0.000982 | CYP3A4,AKR1D1,CYP1A1,CYP2E1,SRD5A2,CYP1A2,SULT1E1,HSD3B2,HSD17B3,UGT2B17,CYP11B1                                                                                                                                                                                             | 11 |

**Supplementary Table 5.** Disease ontology, gene ontology, and Kyoto Encyclopedia of Genes and Genomes analysis of the intersection of MAOA negatively related co-expressed genes and upregulated differentially expressed genes.

| ID                        | Description                         | Gene ratio | Bg ratio  | P-value  | Adjusted P | q-value  | Gene ID                                                                                                         | Count |
|---------------------------|-------------------------------------|------------|-----------|----------|------------|----------|-----------------------------------------------------------------------------------------------------------------|-------|
| <b>Disease Ontology</b>   |                                     |            |           |          |            |          |                                                                                                                 |       |
| DOID:12155                | lymphocytic choriomeningitis        | 3/93       | 8/8007    | 8.14E-05 | 0.031742   | 0.026821 | CCR5,CD86,CXCR3                                                                                                 | 3     |
| DOID:2377                 | multiple sclerosis                  | 9/93       | 169/8007  | 0.000141 | 0.031742   | 0.026821 | BDKRB1,CCL5,CCR5,CD1A,CHIT1,CXCR3,HLA-DPB1,HLA-DRA,SLC1A3                                                       | 9     |
| DOID:3213                 | demyelinating disease acral         | 9/93       | 175/8007  | 0.000184 | 0.031742   | 0.026821 | BDKRB1,CCL5,CCR5,CD1A,CHIT1,CXCR3,HLA-DPB1,HLA-DRA,SLC1A3                                                       | 9     |
| DOID:6367                 | lentiginous melanoma                | 2/93       | 3/8007    | 0.000397 | 0.051276   | 0.043326 | CDKN2A,CSPG4                                                                                                    | 2     |
| DOID:14268                | sclerosing cholangitis              | 3/93       | 15/8007   | 0.000624 | 0.051276   | 0.043326 | CCL5,CCR5,CDKN2A                                                                                                | 3     |
| <b>Biological Process</b> |                                     |            |           |          |            |          |                                                                                                                 |       |
| GO:0042110                | T cell activation                   | 18/158     | 443/17913 | 7.60E-08 | 0.000192   | 0.000173 | AIF1,CCL5,CD2,CD3D,CD3G,CD74,CD83,CD86,FOXJ1,HLA-DMB,HLA-DOA,HLA-DPA1,HLA-DPB1,PLA2G2D,RELB,SIT1,TNFRSF4,ZNF683 | 18    |
| GO:0051249                | regulation of lymphocyte activation | 16/158     | 401/17913 | 5.35E-07 | 0.000676   | 0.00061  | AIF1,CCL5,CD2,CD74,CD83,CD86,FOXJ1,HLA-DMB,HLA-DOA,HLA-DPA1,HLA-DPB1,IL27RA,SIT1,SOX11,TNFRSF4,ZNF683           | 16    |
| GO:0002694                | regulation of leukocyte activation  | 17/158     | 492/17913 | 1.70E-06 | 0.001429   | 0.001288 | AIF1,C1QA,CCL5,CD2,CD74,CD83,CD86,FOXJ1,HLA-DMB,HLA-DOA,HLA-DPA1,HLA-DPB1,IL27RA,SIT1,SOX11,TNFRSF4,ZNF683      | 17    |
| GO:0050863                | regulation of T cell activation     | 13/158     | 307/17913 | 3.42E-06 | 0.002162   | 0.001949 | AIF1,CCL5,CD2,CD74,CD83,CD86,FOXJ1,HLA-DMB,HLA-DOA,HLA-DPA1,HLA-DPB1,SIT1,ZNF683                                | 13    |
| GO:0070098                | chemokine-mediated                  | 6/158      | 51/17913  | 5.56E-06 | 0.002808   | 0.002531 | CCL26,CCL5,CCR5,CCR8,CXCR3,ROBO1                                                                                | 6     |

|                           |                                                                  |       |          |          |          |          |                                                         |   |  |
|---------------------------|------------------------------------------------------------------|-------|----------|----------|----------|----------|---------------------------------------------------------|---|--|
|                           | signaling pathway                                                |       |          |          |          |          |                                                         |   |  |
| <b>Cellular Component</b> |                                                                  |       |          |          |          |          |                                                         |   |  |
| GO:0042613                | MHC class II protein complex                                     | 7/163 | 16/18678 | 3.63E-11 | 8.78E-09 | 7.79E-09 | CD74,HLA-DMB,HLA-DOA,HLA-DPA1,HLA-DPB1,HLA-DQB2,HLA-DRA | 7 |  |
| GO:0042611                | MHC protein complex clathrin-coated                              | 7/163 | 25/18678 | 1.43E-09 | 1.73E-07 | 1.53E-07 | CD74,HLA-DMB,HLA-DOA,HLA-DPA1,HLA-DPB1,HLA-DQB2,HLA-DRA | 7 |  |
| GO:0030669                | endocytic vesicle membrane integral component of luminal side of | 6/163 | 40/18678 | 1.21E-06 | 9.76E-05 | 8.66E-05 | CD74,FZD2,HLA-DPA1,HLA-DPB1,HLA-DQB2,HLA-DRA            | 6 |  |
| GO:0071556                | endoplasmic reticulum membrane luminal side of                   | 5/163 | 29/18678 | 4.77E-06 | 0.00022  | 0.000195 | CD74,HLA-DPA1,HLA-DPB1,HLA-DQB2,HLA-DRA                 | 5 |  |
| GO:0098553                | endoplasmic reticulum membrane                                   | 5/163 | 29/18678 | 4.77E-06 | 0.00022  | 0.000195 | CD74,HLA-DPA1,HLA-DPB1,HLA-DQB2,HLA-DRA                 | 5 |  |
| <b>Molecular Function</b> |                                                                  |       |          |          |          |          |                                                         |   |  |
| GO:0032395                | MHC class II receptor activity                                   | 4/154 | 10/16969 | 1.31E-06 | 0.000376 | 0.000334 | HLA-DOA,HLA-DPA1,HLA-DQB2,HLA-DRA                       | 4 |  |
| GO:0023026                | MHC class II protein complex binding                             | 4/154 | 16/16969 | 1.09E-05 | 0.00156  | 0.001389 | CD74,HLA-DMB,HLA-DOA,HLA-DRA                            | 4 |  |
| GO:0015026                | coreceptor activity                                              | 5/154 | 40/16969 | 2.94E-05 | 0.0028   | 0.002494 | CCR5,CCR8,CD86,IGSF1,RAMP2                              | 5 |  |

|                     |                                         |       |           |          |          |          |                                                                                      |    |
|---------------------|-----------------------------------------|-------|-----------|----------|----------|----------|--------------------------------------------------------------------------------------|----|
| GO:0023023          | MHC protein complex binding             | 4/154 | 25/16969  | 7.11E-05 | 0.005086 | 0.00453  | CD74,HLA-DMB,HLA-DOA,HLA-DRA                                                         | 4  |
| GO:0042277          | peptide binding                         | 8/154 | 215/16969 | 0.000782 | 0.041215 | 0.03671  | BDKRB1,C1QA,CD74,HLA-DPA1,HLA-DPB1,HLA-DRA,MSR1,RAMP2                                | 8  |
| <b>KEGG pathway</b> |                                         |       |           |          |          |          |                                                                                      |    |
| hsa05323            | Rheumatoid arthritis                    | 11/79 | 93/7946   | 1.45E-09 | 2.25E-07 | 1.76E-07 | ACP5,ATP6V0D2,CCL20,CCL5,CD86,HLA-DMB,HLA-DOA,HLA-DPA1,HLA-DPB1,HLA-DRA,LTB          | 11 |
| hsa04640            | Hematopoietic cell lineage              | 10/79 | 99/7946   | 4.02E-08 | 3.12E-06 | 2.43E-06 | CD1A,CD2,CD3D,CD3G,CD5,HLA-DMB,HLA-DOA,HLA-DPA1,HLA-DPB1,HLA-DRA                     | 10 |
| hsa05166            | Human T-cell leukemia virus 1 infection | 13/79 | 219/7946  | 1.96E-07 | 1.01E-05 | 7.92E-06 | BUB1B,CD3D,CD3G,CDKN2A,E2F1,E2F2,HLA-DMB,HLA-DOA,HLA-DPA1,HLA-DPB1,HLA-DRA,MSX1,RELB | 13 |
| hsa05150            | Staphylococcus aureus infection         | 9/79  | 96/7946   | 3.85E-07 | 1.49E-05 | 1.16E-05 | C1QA,C1QC,C3AR1,FPR3,HLA-DMB,HLA-DOA,HLA-DPA1,HLA-DPB1,HLA-DRA                       | 9  |
| hsa05330            | Allograft rejection                     | 6/79  | 38/7946   | 1.71E-06 | 5.29E-05 | 4.13E-05 | CD86,HLA-DMB,HLA-DOA,HLA-DPA1,HLA-DPB1,HLA-DRA                                       | 6  |

**Supplementary Table 6.** Clinical significance of MAOA protein expression level based on in-house tissue microarray.

| Clinical features                  | MAOA protein expression level |         |        | t       | df       | P-value  |
|------------------------------------|-------------------------------|---------|--------|---------|----------|----------|
|                                    | N                             | M       | SD     |         |          |          |
| <b>Tissue</b>                      |                               |         |        |         |          |          |
| HCC                                | 315                           | 8.4190  | 2.4886 | 18.3753 | 495.1975 | <0.0001* |
| non-HCC                            | 192                           | 11.5208 | 1.3023 |         |          |          |
| <b>Age</b>                         |                               |         |        |         |          |          |
| <60                                | 231                           | 8.5714  | 2.4782 | 1.8087  | 313.0000 | 0.0715   |
| >=60                               | 84                            | 8.0000  | 2.4837 |         |          |          |
| <b>Gender</b>                      |                               |         |        |         |          |          |
| Male                               | 274                           | 8.4672  | 2.5651 | 1.1064  | 64.2379  | 0.2727   |
| Female                             | 41                            | 8.0976  | 1.8948 |         |          |          |
| <b>Pathological stage</b>          |                               |         |        |         |          |          |
| I                                  | 17                            | 8.7059  | 2.1144 | 0.1547  | 312.0000 | 0.9608   |
| I-II                               | 25                            | 8.1600  | 2.4440 |         |          |          |
| II                                 | 204                           | 8.4314  | 2.4735 |         |          |          |
| II-III                             | 27                            | 8.5926  | 2.6495 |         |          |          |
| III                                | 40                            | 8.4000  | 2.6871 |         |          |          |
| <b>TNM</b>                         |                               |         |        |         |          |          |
| T1-T2                              | 235                           | 9.0894  | 2.0351 | 8.0882  | 109.9644 | <0.0001* |
| T3-T4                              | 79                            | 6.4304  | 2.6732 |         |          |          |
| <b>TNM_T</b>                       |                               |         |        |         |          |          |
| T1                                 | 3                             | 12.0000 | 0.0000 | 30.5695 | 313.0000 | <0.0001* |
| T2                                 | 232                           | 9.0517  | 2.0209 |         |          |          |
| T3                                 | 72                            | 6.4444  | 2.7316 |         |          |          |
| T4                                 | 7                             | 6.2857  | 2.1381 |         |          |          |
| <b>TNM_N</b>                       |                               |         |        |         |          |          |
| N0                                 | 307                           | 8.4300  | 2.4992 | 0.4507  | 312.0000 | 0.6525   |
| N1                                 | 7                             | 8.0000  | 2.3094 |         |          |          |
| <b>TNM_M</b>                       |                               |         |        |         |          |          |
| M0                                 | 313                           | 8.4345  | 2.4839 | 1.7825  | 312.0000 | 0.0756   |
| M1                                 | 1                             | 4.0000  | /      |         |          |          |
| <b>Smoking</b>                     |                               |         |        |         |          |          |
| No                                 | 91                            | 8.2198  | 2.6907 | 0.3919  | 159.0000 | 0.6956   |
| Yes                                | 70                            | 8.0571  | 2.5015 |         |          |          |
| <b>Alcohol consumption</b>         |                               |         |        |         |          |          |
| No                                 | 82                            | 8.3415  | 2.6815 | 0.9551  | 159.0000 | 0.3410   |
| Yes                                | 79                            | 7.9494  | 2.5212 |         |          |          |
| <b>Hepatitis history</b>           |                               |         |        |         |          |          |
| No                                 | 60                            | 8.4000  | 2.7259 | 0.7184  | 147.0000 | 0.4736   |
| Yes                                | 89                            | 8.0899  | 2.4847 |         |          |          |
| <b>Family liver cancer history</b> |                               |         |        |         |          |          |
| No                                 | 132                           | 8.3939  | 2.5615 | -0.0574 | 139.0000 | 0.9543   |

|                        |     |        |        |        |          |        |
|------------------------|-----|--------|--------|--------|----------|--------|
| Yes                    | 9   | 8.4444 | 2.4037 |        |          |        |
| <b>Tumor size (cm)</b> |     |        |        |        |          |        |
| <3                     | 10  | 9.6000 | 2.7968 | 1.7131 | 133.0000 | 0.0890 |
| >=3                    | 125 | 8.0960 | 2.6622 |        |          |        |

---

Footnote: \* A P-value < 0.05 indicates statistical significance.

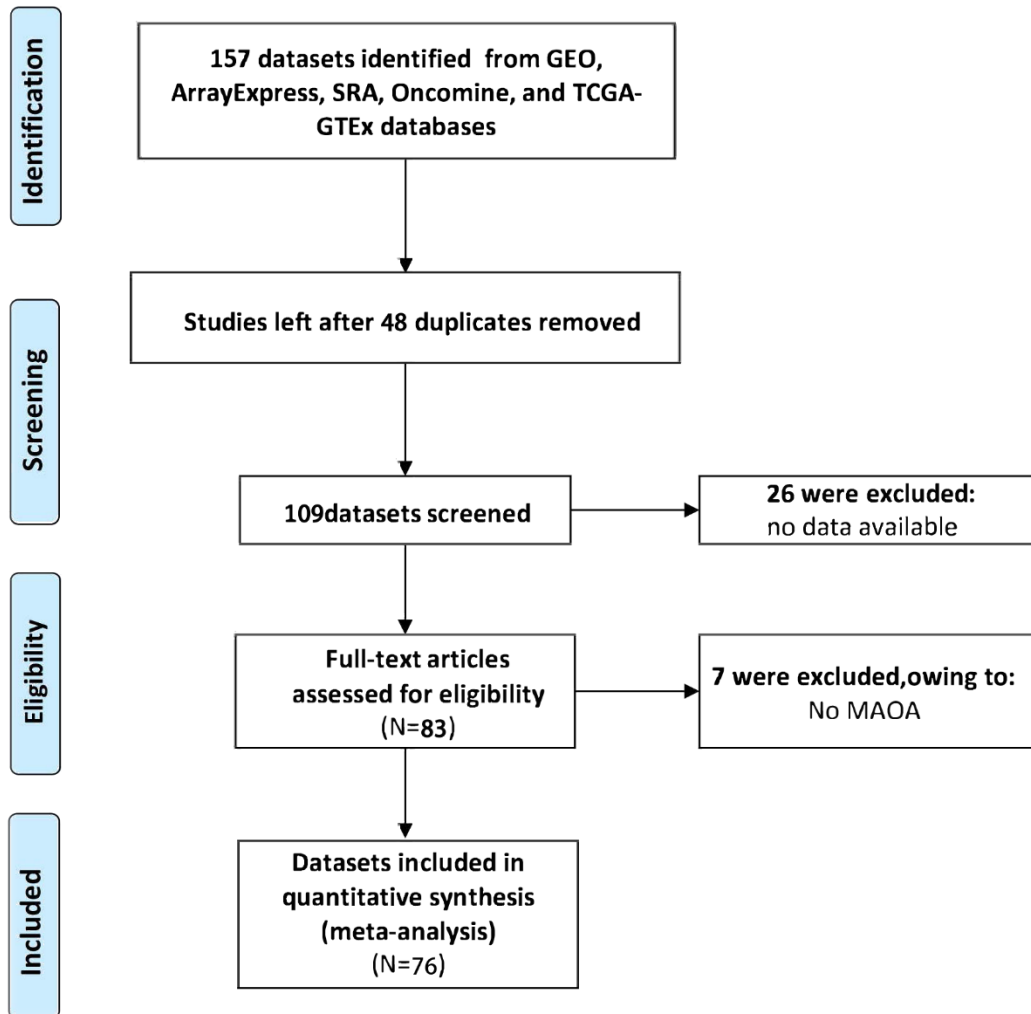

**Supplementary Figure 1.** The flow chart of the included datasets for differentially expressed gene analysis.



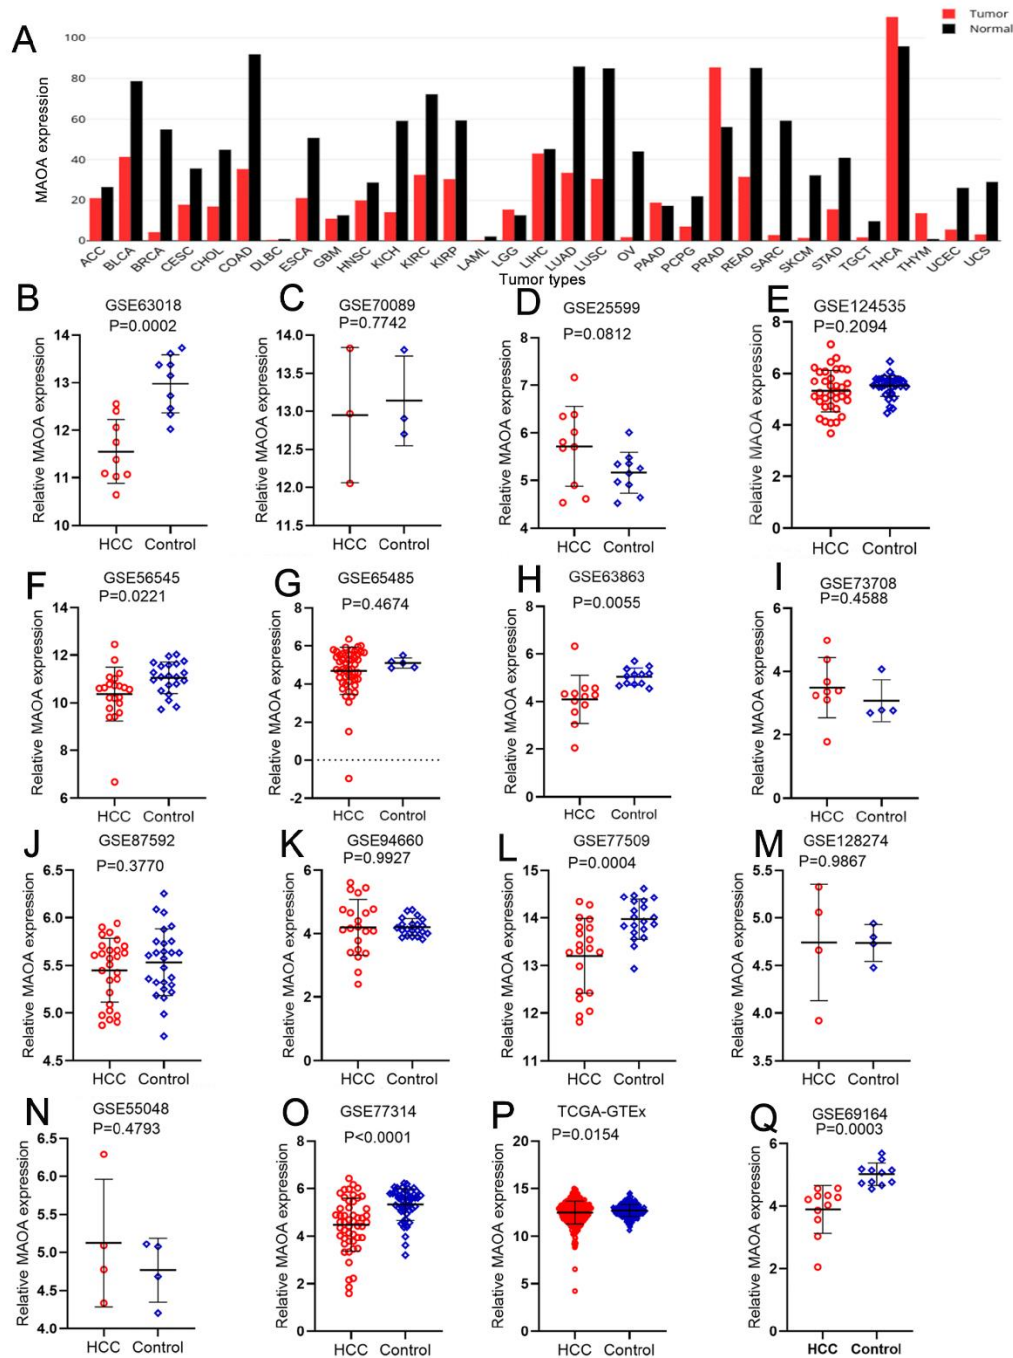

**Supplementary Figure 2.** The expression status of *MAOA* in various tumors and scatter plot of the *MAOA* expression levels. Decreased *MAOA* expression levels were found in hepatocellular carcinoma patients compared to non-cancer groups based on the included RNA sequencing datasets. TCGA, the Cancer Genome Atlas; GTEx, the Genotype-Tissue Expression; LIHC, liver hepatocellular carcinoma. The error bars in the scatter dot plot line at mean with standard deviation.

(A) The expression statuses in 31 kinds of tumors from Gene Expression Profiling Interactive Analysis (GEPIA). (B) GSE63018, (C) GSE70089, (D) GSE25599, (E) GSE124535, (F) GSE56545, (G) GSE65485, (H) GSE63863, (I) GSE73708, (J) GSE87592, (K) GSE94660, (L) GSE77509, (M) GSE128274, (N) GSE55048, (O) GSE77314, (P) TCGA-GTEx, and (Q) GSE69164.

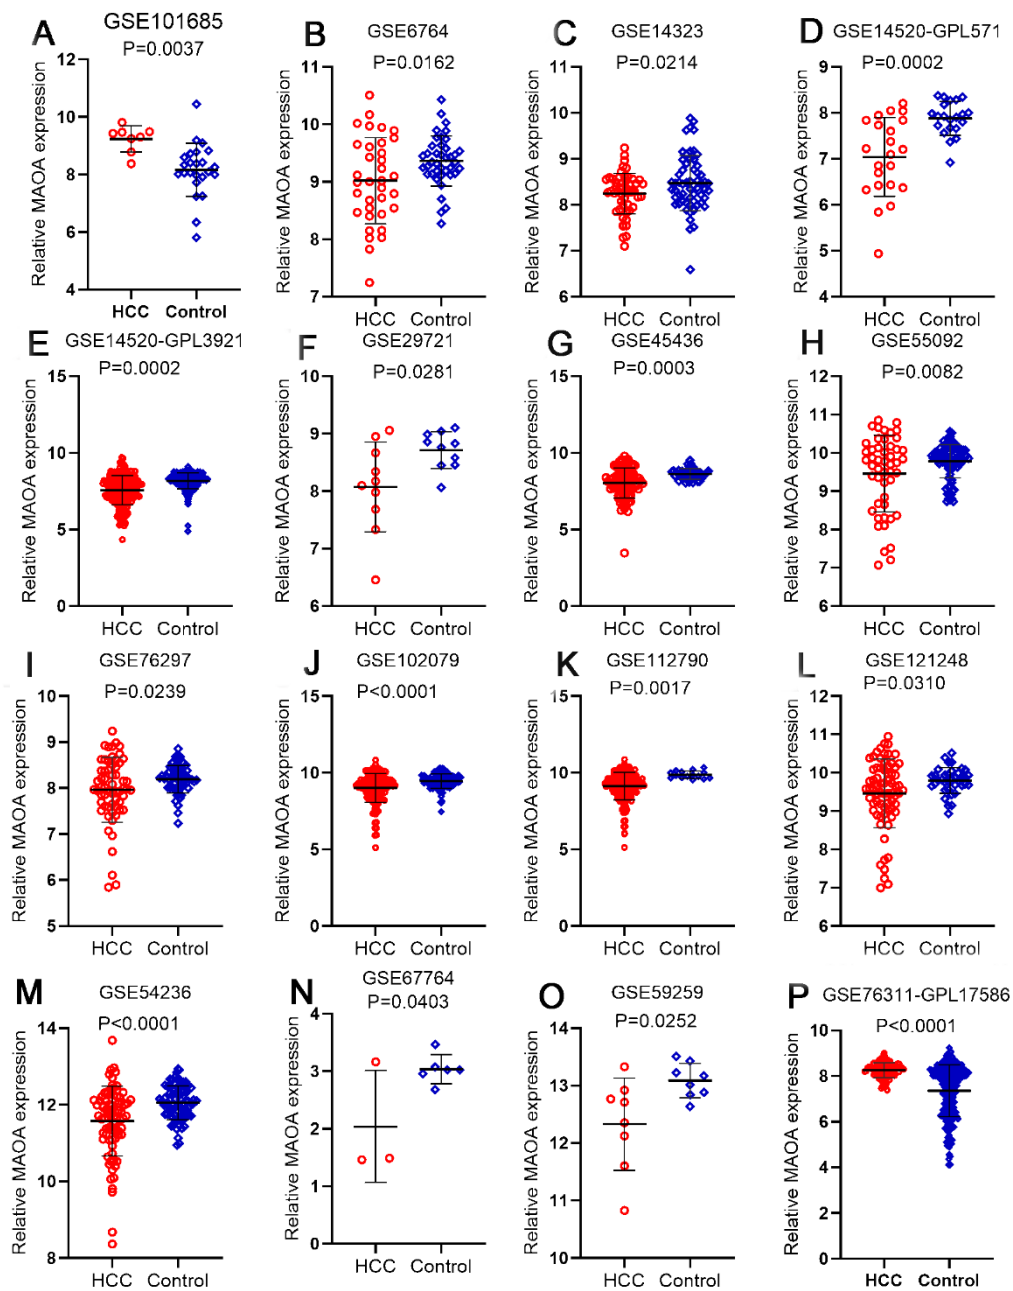

**Supplementary Figure 3.** Scatter plot of the MAOA expression between hepatocellular carcinoma patients and non-cancer groups based on the included genechip datasets. The error bars in the scatter dot plot line at mean with standard deviation.

(A) GSE101685, (B) GSE6764, (C) GSE14323, (D) GSE14520-GPL571, (E) GSE14520-GPL3921, (F) GSE29721, (G) GSE45436, (H) GSE55092, (I) GSE76297, (J) GSE102079, (K) GSE112790, (L) GSE121248, (M) GSE54236, (N) GSE67764, (O) GSE59259, and (P) GSE76311-GPL17586.

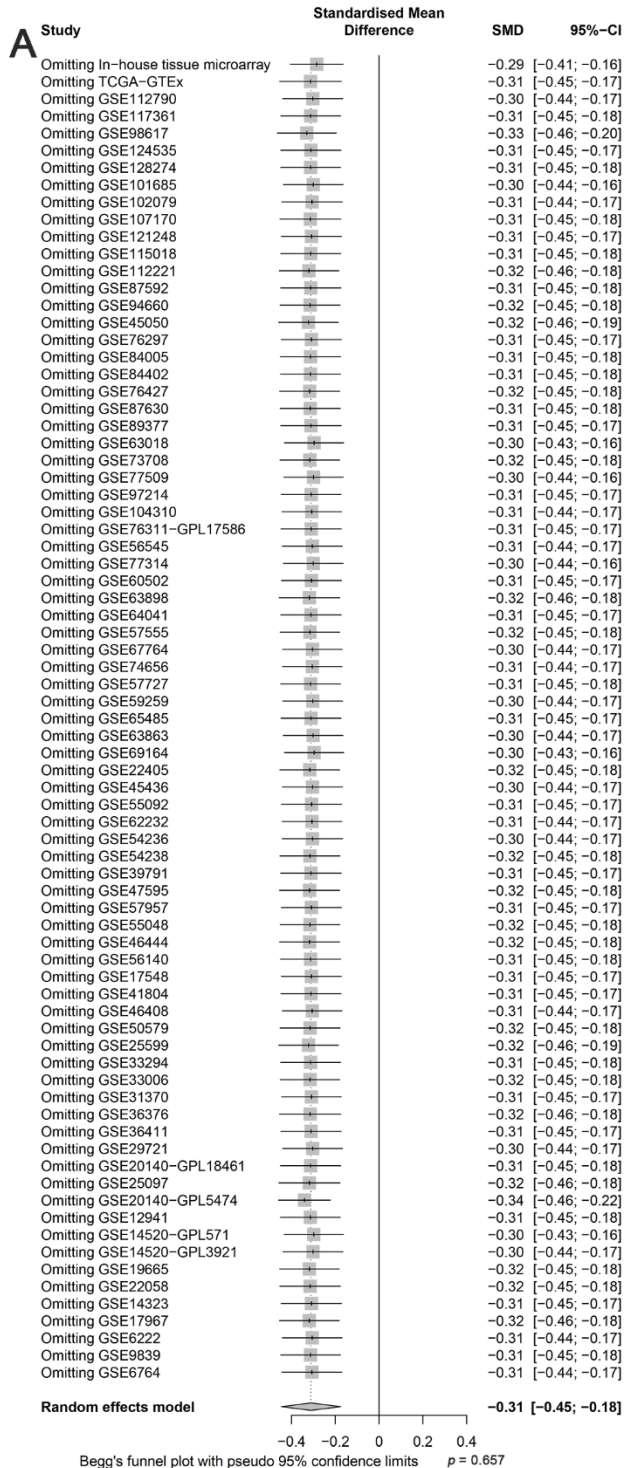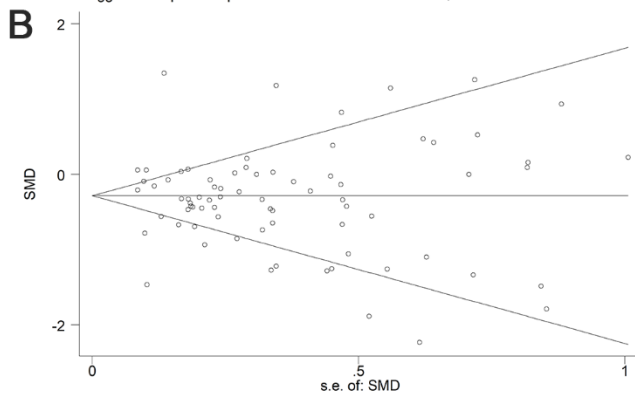

### Supplementary Figure 4.

Assessment of the heterogeneity source.

(A) Sensitive analysis indicated that no significant difference existed among the enrolled studies. (B) Begg's funnel plot showed that there was no significant publication bias.

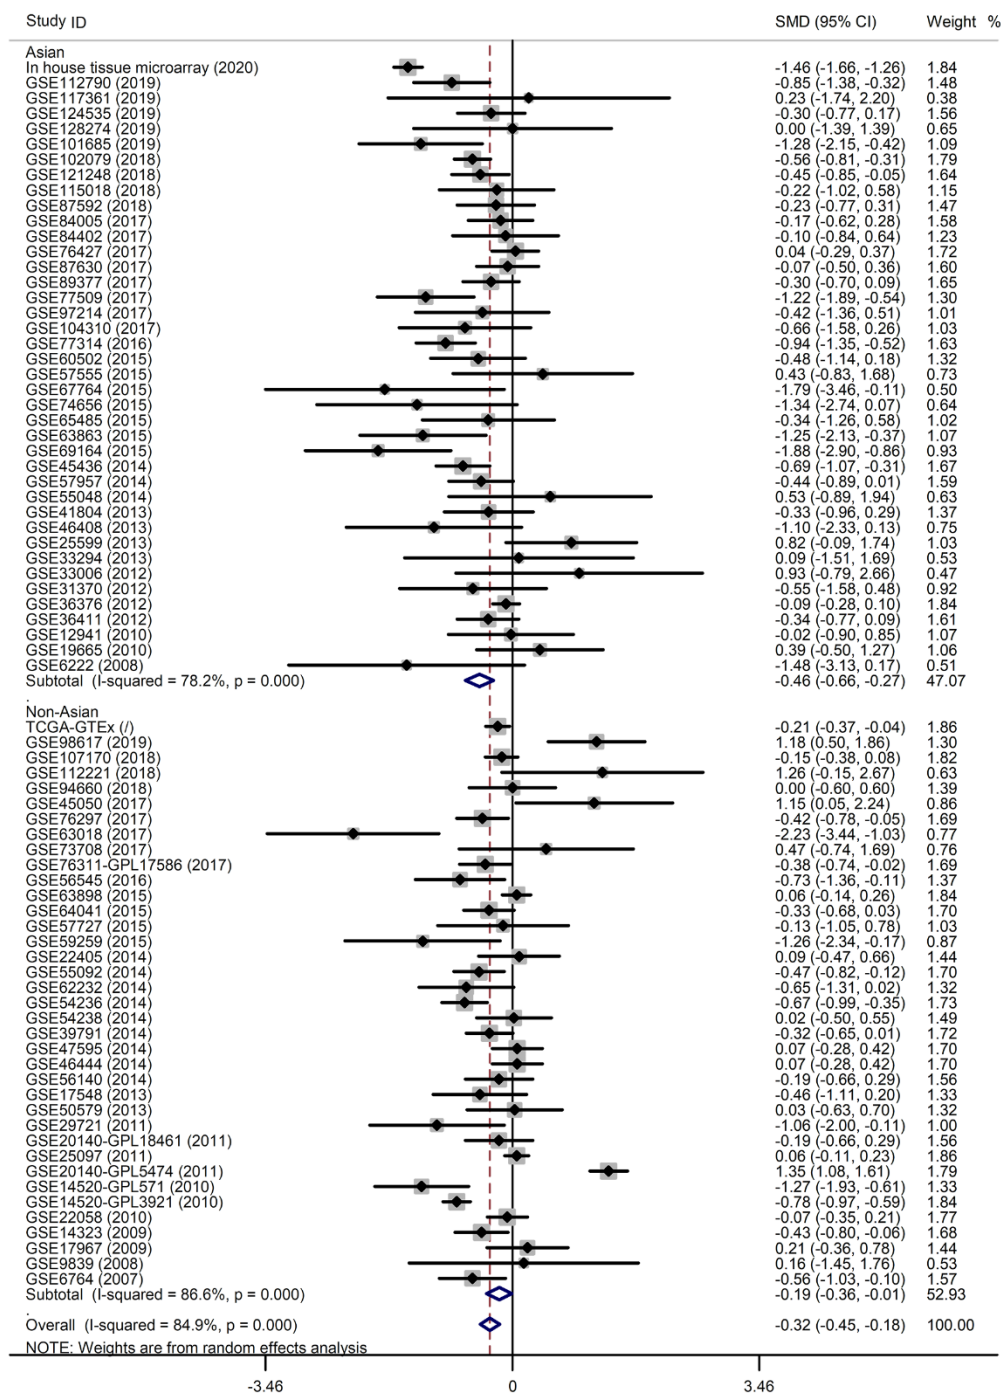

**Supplementary Figure 5.** Subgroup analysis based on the ethnicities of hepatocellular carcinoma patients. No significant difference between subgroups was found.

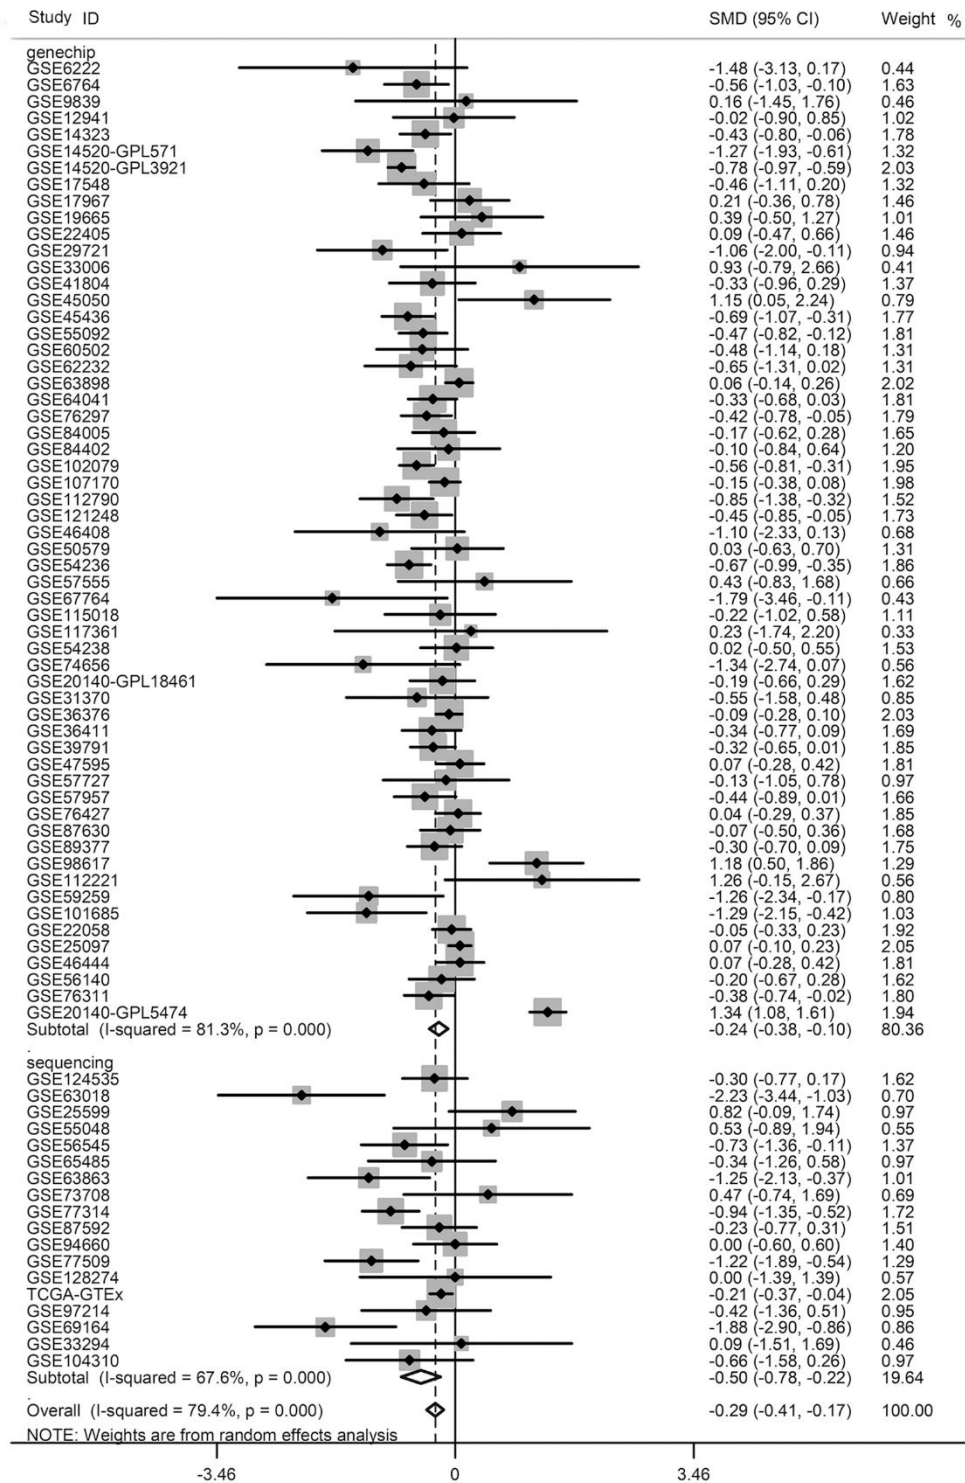

**Supplementary Figure 6.** Subgroup analysis based on the included datasets in terms of the methods used to determine the expression levels of *MAOA* in hepatocellular carcinoma patients (i.e., genechip and RNA-sequencing). No significant difference between subgroups was found.

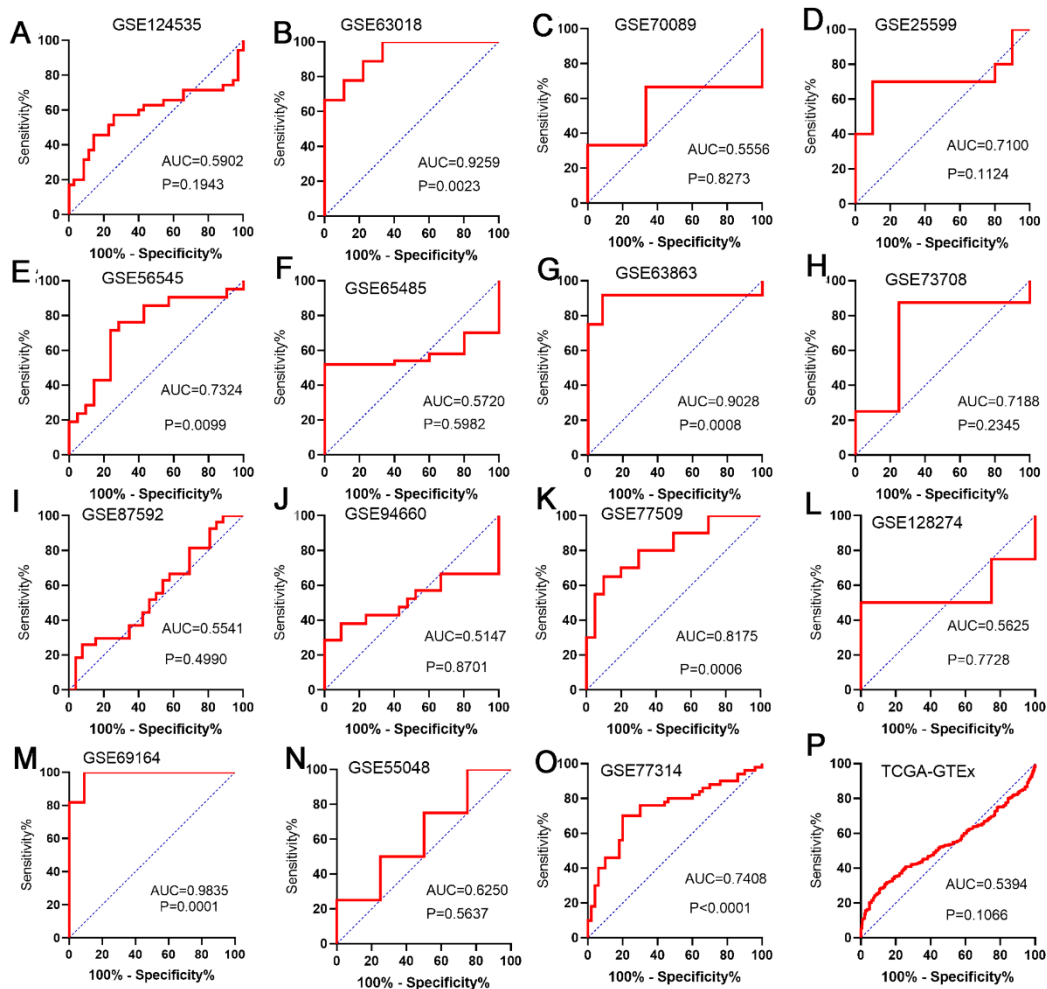

**Supplementary Figure 7.** The Receiver Operating Characteristic (ROC) curve of *MAOA* expression based on the included RNA sequencing datasets. TCGA, the Cancer Genome Atlas; GTEx, the Genotype-Tissue Expression. (A) GSE124535, (B) GSE63018, (C) GSE70089, (D) GSE25599, (E) GSE56545, (F) GSE65485, (G) GSE63863, (H) GSE73708, (I) GSE87592, (J) GSE94660, (K) GSE77509, (L) GSE128274, (M) GSE69164, (N) GSE55048, (O) GSE77314, and (P) TCGA-GTEx.



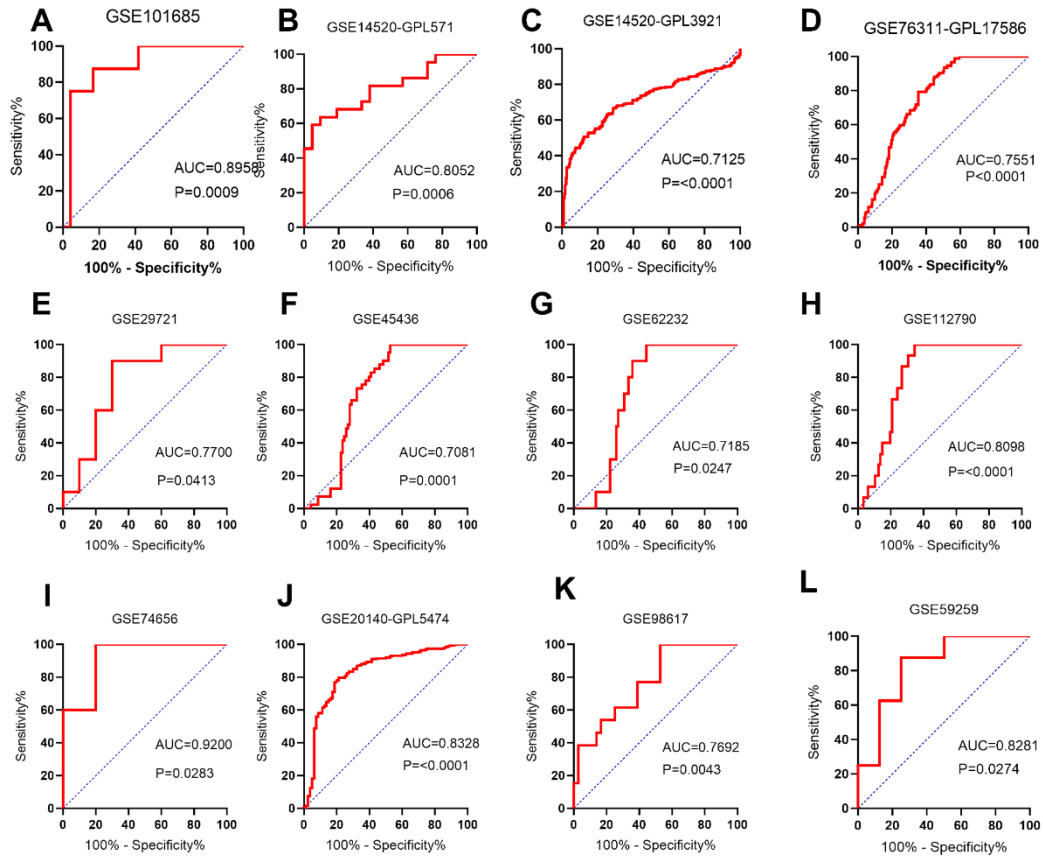

**Supplementary Figure 8.** The Receiver Operating Characteristic (ROC) curve of MAOA expression based on the included genechip datasets. (A) GSE101685, (B) GSE14520-GPL571, (C) GSE14520-GPL3921, (D) GSE76311-GPL17586, (E) GSE29721, (F) GSE45436, (G) GSE62232, (H) GSE112790, (I) GSE74656, (J) GSE20140-GPL5474, (K) GSE98617, and (L) GSE59259.

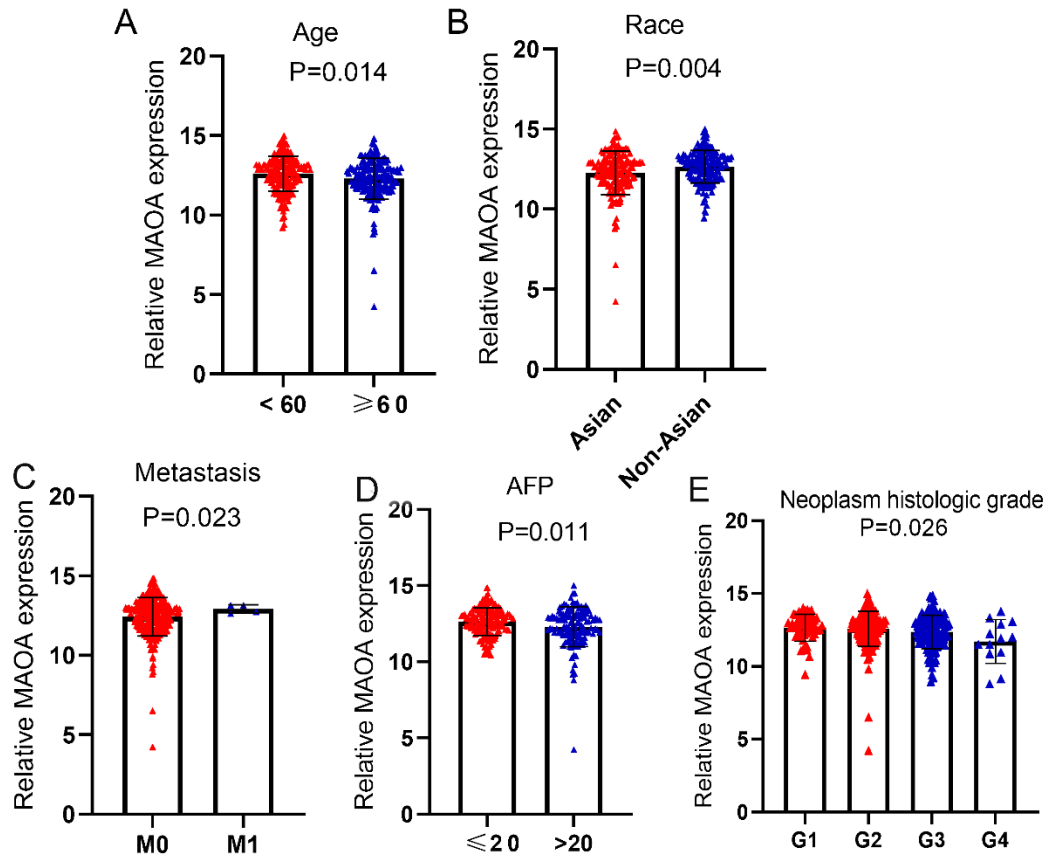

**Supplementary Figure 9.** The relationships between the clinical features of HCC patients and *MAOA* mRNA expression level. The down-regulated expression level of *MAOA* was relevant to age, race, tumor metastasis status, neoplasm histologic grade, and AFP concentration (> 20 ng/mL) (all with P-values < 0.05).



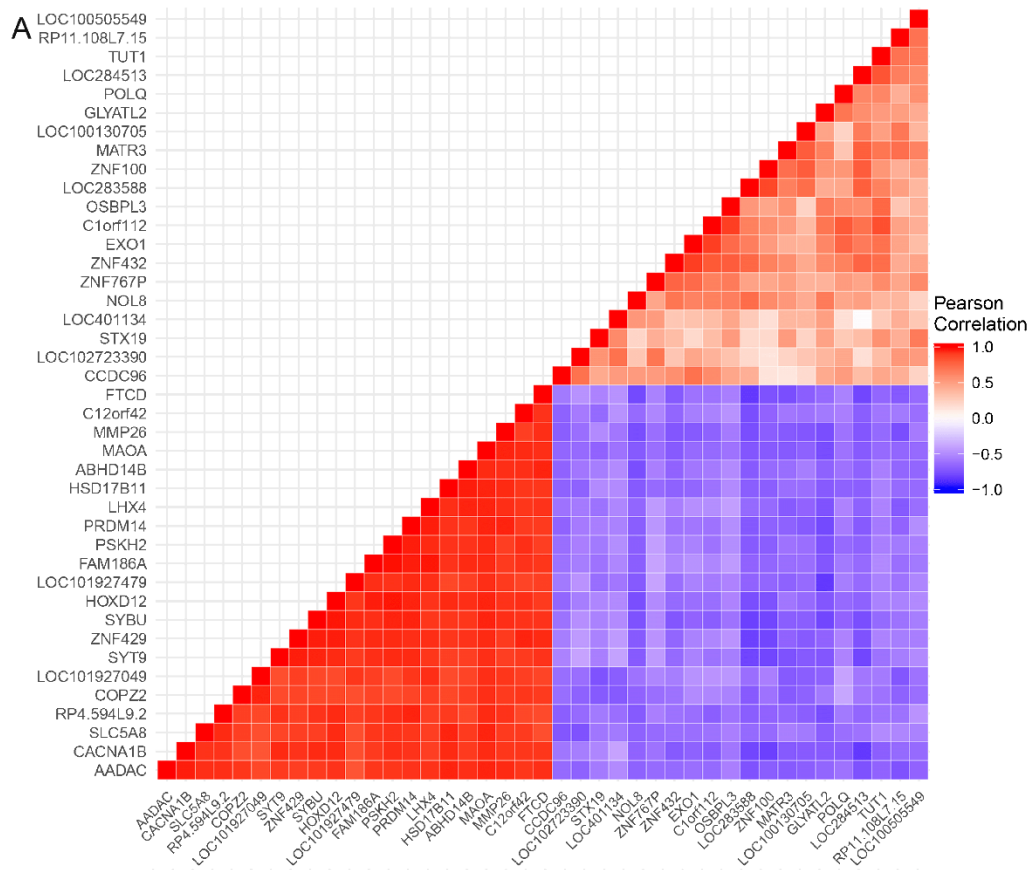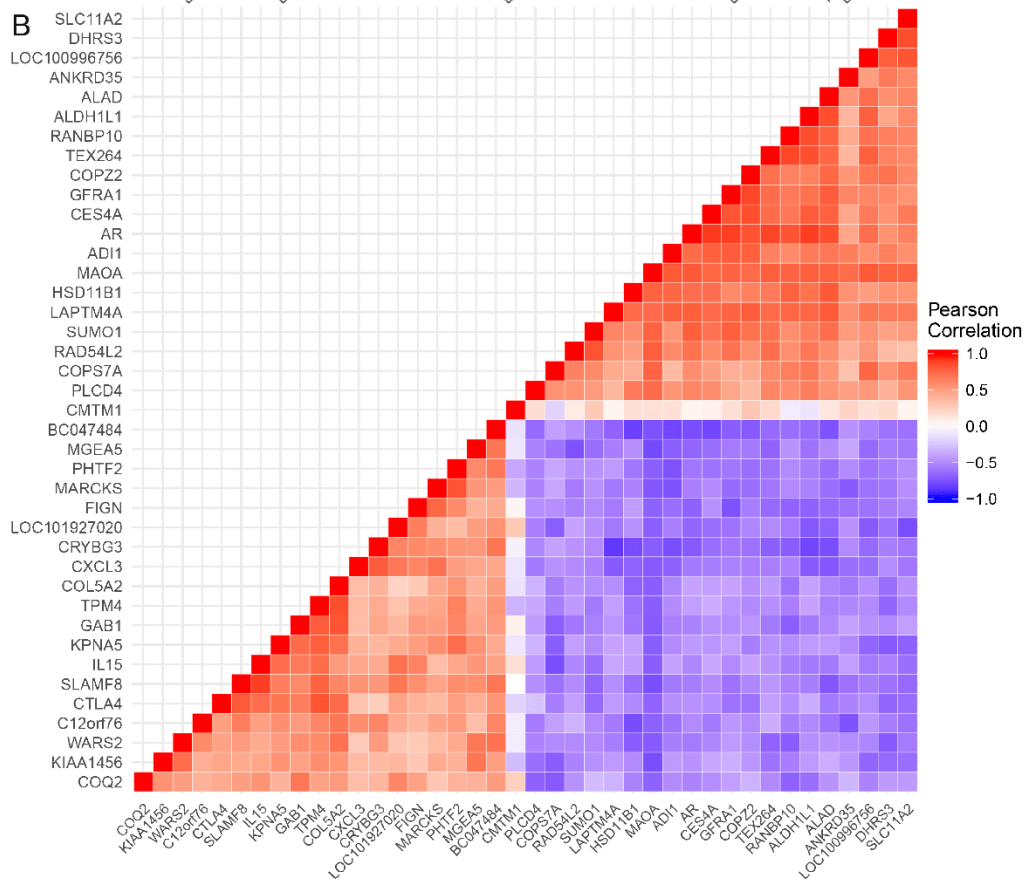

**Supplementary Figure 10.** Heatmaps based on the calculated Pearson's correlation coefficient of (A) GSE6222 and (B) GSE19665.





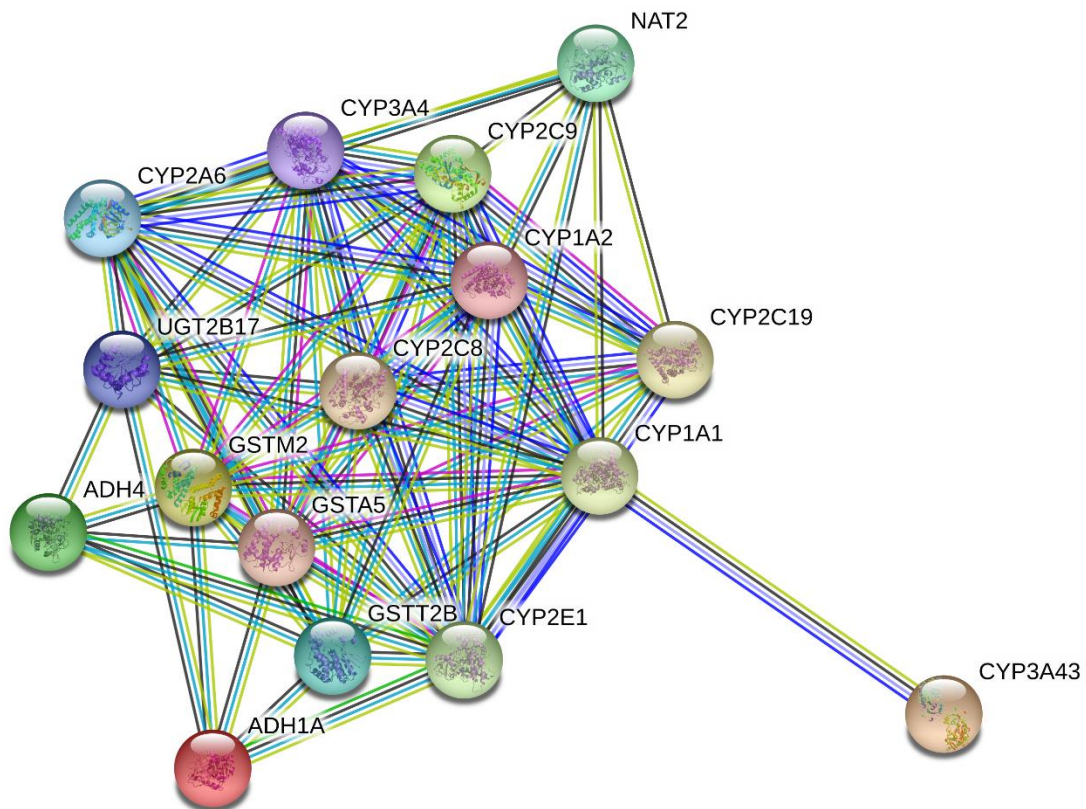

**Supplementary Figure 13.** Protein-to-protein interaction network based on the genes clustered in the Chemical carcinogenesis pathway.

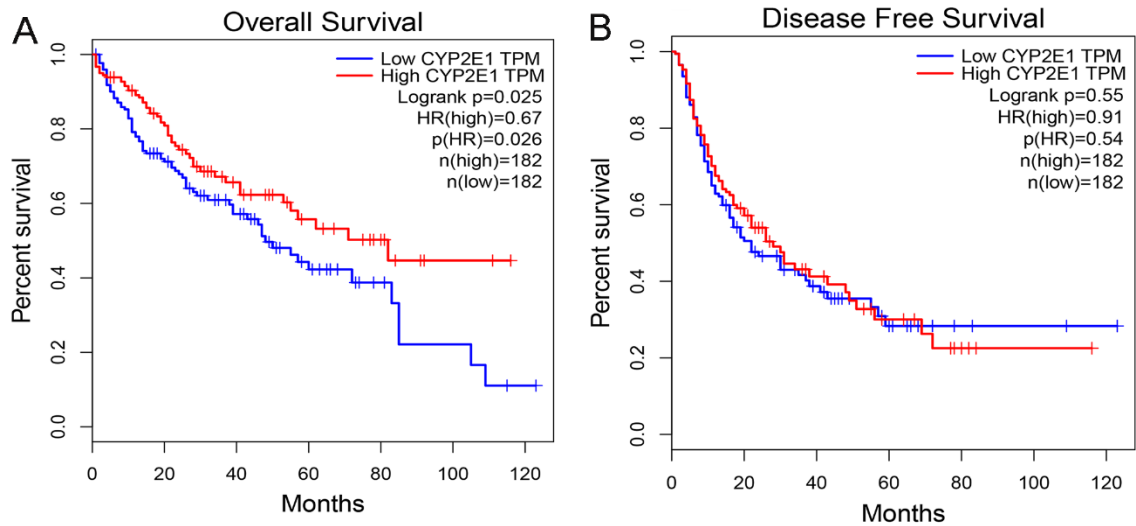

**Supplementary Figure 14.** Kaplan-Meier curves of the hepatocellular carcinoma patients based on the hub gene.

**(A)** Low CYP2E1 correlated with reduced overall survival in HCC patients. **(B)** The disease-free survival condition of low and high CYP2E1 group in HCC patients signified no significant difference.

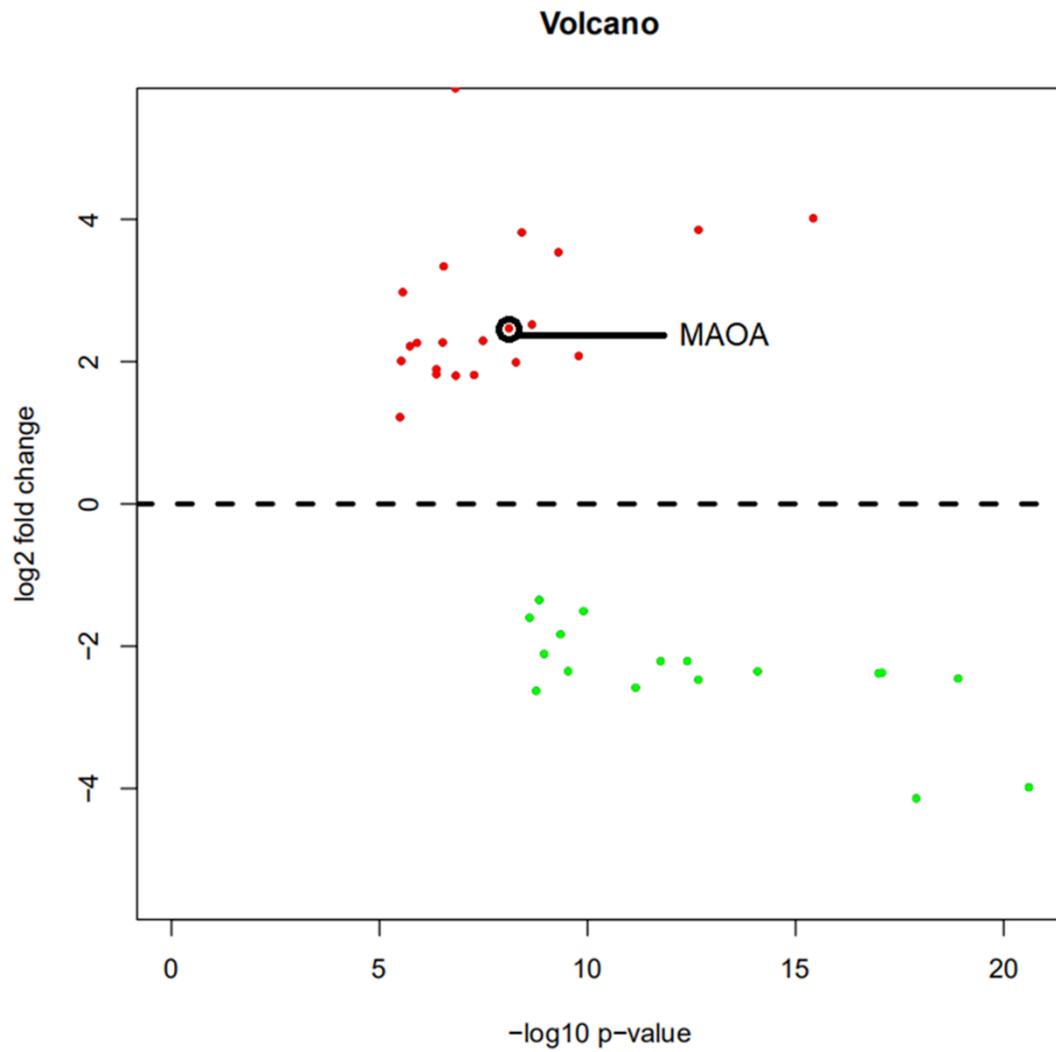

**Supplementary Figure 15** A volcano plot based on differentially expressed genes of NC-treated HCC mouse model. *MAOA* expression level was significantly elevated in NC-treated group compared to control group. NC, nitidine chloride.
